# Supplementary material for: Pharmacogenomics-Driven Multimodal Data Integration Improves Predictions of Adverse Drug Reactions in Cancer Patients using Machine Learning
Source: Research Square preprint supplement (doi:10.21203/rs.3.rs-7431071/v1), 2025-09-23
Supplement: Supplementary file 1 [file b262b249a53c7df7343c57b6.docx]

##### **Supplementary tables**

**Supplementary Table 1. List of 169 pharmacogenes included in the analysis, curated from** the Pharmacogenomics Knowledgebase (**PharmGKB)** and Clinical Pharmacogenetics Implementation Consortium (**CPIC)** databases.

| Chromosome | Genes |
| --- | --- |
| Chr 1 | *MTHFR, CYP4B1, CYP4A11, CYP4A22, CYP2J2, PTGFR, DPYD, GSTM1, NRAS, GBA, FDPS, FCGR3A, F5, SERPINC1, ABL2, PTGS2, CACNA1S, CYB5R1, EPHX1* |
| Chr 2 | *ALK, CYP1B1, ACYP2, GGCX, PROC, SCN1A, CPS1, ATIC, UGT1A4, UGT1A1* |
| Chr 3 | *XPC, SCN5A, PROS1, NR1I2, SLC15A2, UMPS, P2RY12, P2RY1, BCHE* |
| Chr 4 | *KIT, UGT2B17, UGT2B15, UGT2B7, COQ2, ABCG2, ADH1A, ADH1B, ADH1C, EGF* |
| Chr 5 | *MTRR, HTR1A, HMGCR, ADRB2, LTC4S* |
| Chr 6 | *TPMT, HLA-A, CCHCR1, HLA-C, HLA-B, TNF, HLA-DRB1, HLA-DQA1, HLA-DPB1, FKBP5, KIF6, CYB5R4, OPRM1, SOD2, SLC22A1, SLC22A2, LPA* |
| Chr 7 | *CYP2W1, AHR, CRHR2, EGFR, ASL, POR, SEMA3C, ABCB1, CYP3A5, CYP3A7-CYP3A51P, CYP3A4, CYP3A43, CFTR, CALU, TBXAS1, BRAF, KCNH2* |
| Chr 8 | *NAT1, NAT2, C8orf34-AS1, COL22A1* |
| Chr 9 | *ALDH1A1, SLC28A3, PTGS1, ASS1, ABL1* |
| Chr 10 | *ALOX5, CYP26A1, CYP2C19, CYP2C9, CYP2C8, CYP17A1, NT5C2, ADRB1, GRK5, CYP2E1* |
| Chr 11 | *CYB5R2, CYP2R1, KCNJ11, GSTP1, SLCO2B1, DYNC2H1, C11orf65, ANKK1, DRD2, GRIK4* |
| Chr 12 | *GNB3, SLCO1B3, SLCO1B1, KRAS, VDR, YEATS4* |
| Chr 13 | *HTR2A, NUDT15, ABCC4* |
| Chr 14 | *-none-* |
| Chr 15 | *CYP19A1, CYP1A1, CYP1A2, CHRNA3, POLG* |
| Chr 16 | *SULT1A1, VKORC1, CES1, CETP, HAS3, NQO1* |
| Chr 17 | *GP1BA, SLC6A4, ERBB2, BRCA1, NAGS, LINC02210-CRHR1, ACE, PRKCA* |
| Chr 18 | *TYMS, NEDD4L, MC4R* |
| Chr 19 | *LDLR-AS1, CYP4F2, RYR1, IFNL3, IFNL4, CYP2A6, CYP2B6, CYP2A13, CYP2F1, CYP2S1, APOE, ERCC1* |
| Chr 20 | *ITPA, PTGIS* |
| Chr 21 | *CBR3-AS1, SLC19A1* |
| Chr 22 | *COMT, BCR, SPECC1L-ADORA2A, CYP2D6, CYB5R3* |

**Supplementary Table 2. SNPs associated with pharmacogenetic response to selected antineoplastic drugs, sourced from** Pharmacogenomics Knowledgebase (**PharmGKB).**

| **Drug** | **Associated RSIDs reported in PharmGKB** |
| --- | --- |
| **Fluorouracil** | rs10040363, rs1045642, rs1047840, rs1056515, rs1056836, rs10937158, rs112242273, rs112783657, rs11280056, rs11479, rs115232898, rs115457081, rs115632870, rs11615, rs11636687, rs117101815, rs117341846, rs117458836, rs117951771, rs118088833, rs118129530, rs1184321568, rs12050587, rs1212037891, rs12248560, rs12613732, rs12659, rs13181, rs1335150891, rs138602176, rs140039091, rs140989814, rs141084494, rs142244113, rs143004875, rs143879757, rs144991623, rs145623321, rs148013902, rs148235907, rs148994843, rs149212925, rs150688309, rs1695, rs17109924, rs17160359, rs17179108, rs17376848, rs17431184, rs1760944, rs17626122, rs1799782, rs1799983, rs1800566, rs1801131, rs1801133, rs1801158, rs1801159, rs1801160, rs1801265, rs1801266, rs1801268, rs1801516, rs181501757, rs183205964, rs187713395, rs188052243, rs1979277, rs201045130, rs2010851, rs201268750, rs2016520, rs20572, rs2070744, rs2075685, rs2228100, rs2231142, rs2236722, rs225440, rs2273697, rs2289310, rs2291078, rs2292997, rs2293347, rs2297595, rs2298881, rs25487, rs25648, rs2847153, rs2854744, rs2960436, rs299293, rs299313, rs299314, rs3212986, rs3218592, rs3219489, rs351855, rs367619008, rs368146607, rs369103276, rs370457585, rs371194629, rs371258350, rs372307932, rs3740066, rs374150125, rs374527058, rs374825099, rs3749438, rs376073289, rs3772809, rs3772810, rs3805945, rs3917412, rs3918290, rs41412545, rs4149056, rs4244285, rs45445694, rs4968187, rs527580106, rs528152707, rs536577604, rs538336580, rs538703919, rs548783838, rs55633228, rs558354142, rs55886062, rs56005131, rs56022120, rs56038477, rs568367673, rs569661196, rs570122671, rs575853463, rs58695150, rs59086055, rs6025211, rs662, rs67376798, rs6907567, rs699947, rs714368, rs717620, rs7194667, rs72549303, rs72549306, rs72549309, rs72728438, rs7325568, rs74743371, rs748620513, rs75017182, rs755416212, rs758649719, rs7699188, rs77769901, rs78060119, rs78428806, rs79430272, rs8110364, rs861539, rs895819, rs9344, rs9380142, rs9389568, rs9402944, rs9561778, rs9679162 |
| **Capecitabine** | rs1045642, rs1047840, rs1048943, rs1048977, rs1128503, rs11479, rs11615, rs11861118, rs11942466, rs12022243, rs12119882, rs12132152, rs143004875, rs1695, rs17160359, rs17179108, rs17376848, rs17431184, rs1801131, rs1801133, rs1801158, rs1801159, rs1801160, rs1801265, rs183205964, rs2010963, rs2016520, rs2032582, rs2072671, rs2231142, rs2236722, rs2244613, rs2244614, rs2270860, rs2279199, rs2289310, rs2291078, rs2297595, rs2612091, rs2741171, rs2853741, rs3215400, rs3217164, rs3218592, rs367619008, rs371194629, rs3772809, rs3772810, rs3917412, rs3918290, rs4149178, rs4678145, rs4702484, rs5275, rs55886062, rs56038477, rs602950, rs67376798, rs699517, rs699947, rs7187684, rs75017182, rs755416212, rs76387818, rs885036, rs895819, rs9380142, rs9936750 |
| **Methotrexate** | rs10197559, rs1045642, rs1051266, rs1051296, rs1053129, rs1059150, rs10821936, rs10841753, rs10994982, rs11045821, rs11045872, rs11045879, rs1105525, rs11231809, rs1127354, rs11280056, rs1128503, rs11545076, rs11545077, rs11545078, rs117532069, rs12505410, rs1264457, rs13120400, rs13137622, rs13181, rs141059755, rs1476413, rs1544105, rs1643650, rs1650723, rs16853826, rs1695, rs17004921, rs17021408, rs1703794, rs17222723, rs17421511, rs17602729, rs17731538, rs1799983, rs1800909, rs1801131, rs1801133, rs1801394, rs1805087, rs1891059, rs1901633, rs1979277, rs2070744, rs2229109, rs2231135, rs2231142, rs2236225, rs2236624, rs2238476, rs2267076, rs2273697, rs2292596, rs2298383, rs2302489, rs2306283, rs2372536, rs2413739, rs246240, rs2650972, rs28364006, rs2838956, rs2838958, rs2853539, rs351855, rs35592, rs371194629, rs3740065, rs3758149, rs3761422, rs3761548, rs3763980, rs3768142, rs3784864, rs3824662, rs408626, rs4148324, rs4148416, rs4148737, rs4149009, rs4149056, rs4149081, rs442767, rs45445694, rs4673993, rs4846051, rs4880, rs4888024, rs4948496, rs4982133, rs4986790, rs5760410, rs6064463, rs61886492, rs639174, rs6506569, rs6920220, rs70991108, rs7142143, rs717620, rs719235, rs7270101, rs7301582, rs7317112, rs7624766, rs79085477, rs7992226, rs80223967, rs9344, rs9345389, rs9516519, rs9895420, rs9977268 |
| **Tamoxifen** | rs10030044, rs1045642, rs10509373, rs11023197, rs1804645, rs2011425, rs2740574, rs310786, rs3740065, rs4646, rs478437, rs4986938, rs717620, rs8060157, rs9340799 |

**Supplementary Table 3. Hyperparameters used for tuning machine learning, their tested ranges, and selected optimal values.** The bolded values represent the hyperparameter settings that yielded the best model evaluation scores during tuning.

| **Model** | **Hyperparameters** | **Tested values** | **definition** |
| --- | --- | --- | --- |
| **LR** | C | 0.01, **0.1**, 1, 10, 100, 200, 500, 800, 1000 | Inverse of regularization strength (1/λ) |
| L1 ratio | 0, **0.1**, 0.15 0.25, 0.5, 0.75, 0.9, 1 | Specifies the mix of L1 and L2 regularization applied in the elastic net; 0 indicating L2 (Ridge) regularization |
| **MLP** | Hidden layer sizes | 32, 64, 128, 256, 512, 1024 | Number of neurons in the hidden layer |
| Activation | **ReLU**, Tanh, Logistic, Leaky ReLU | The function used to introduce nonlinearities into the network, which allows the network to learn more complex functions |
| Solver | **Adam**, SGD | This defines the method or algorithm used to update the weights of the nodes during training to minimize the loss function |
| Learning rate | 0.01, 0.001, **0.0001**, 0.00001 | It determines the size of the steps the optimizer takes towards the minimum of the loss function during training |
| Batch size | 16, 32, 64, **128**, 256 | The number of training examples used to calculate the gradient during training |
| Max iter | 100, 200, **300**, 500 | The number of learning iterations the solver will run for training |
| Alpha | 0.01, **0.001**, 0.0001 | L2 regularization parameter |
| **RF** | N estimators | 100, 300, 500, 1000, **2000**, 4000 | Number of trees in the forest |
| Max depth | 10, **20**, 30, None | Maximum depth of each tree |
| Min samples split | **2**, 5, 10, 50 | Minimum number of samples required to split an internal node |
| Min samples leaf | **2**, 4, 6 | Minimum number of samples required to be at a leaf node |
| Max features | **Sqrt**, Log2, None | Number of features to consider when looking for the best split |
| **SVM** | C | 0.01, 0.1, 1, **10**, 100 | Regularization parameter: controls the trade-off between achieving a low bias and a low variance. A higher ‘C’ value can lead to a lower bias but higher variance. |
| Kernel type | Linear, Polynomial, **RBF**, Sigmoid | Transform the input data into a higher-dimensional space to make it easier to find a linear boundary between different classes. |
| Gamma | **Scale**, Auto | Determines the influence of individual training examples on the decision boundary |
| **XGBoost** | N estimators | 100, **300**, 500 | Number of trees or number of boosting rounds |
| Max depth | 3, 5, **7**, 9, 12 | Maximum depth of a tree |
| Learning rate | 0.01, **0.1**, 0.2 | Controls how quickly the model adapts to the problem |
| Subsample | 0.4, 0.6, **0.8** | Fraction of samples to use for each tree |
| Colsample bytree | 0.4, 0.6, **0.8** | Fraction of features to use when constructing each tree |
| gamma (min split loss) | 0.05, **0.1**, 0.2 | Minimum loss reduction required to make an additional partition on a leaf node |
| Alpha | 0, **0.1**, 0.3, 0.5, 0.7 | L1 regularization on the weights |
| Lambda | 0, **0.1**, 0.3, 0.5, 0.7, 1 | L2 regularization on the weights |

LR: linear regression, Multilayer Perception (MLP), RF: Random Forest, Support Vector Machine (SVM), eXtreme Gradient Boosting: XGBoost.

**Supplementary Table 4. Univariate analysis of environmental (demographic, lifestyle, clinical) and comorbid features in the complete cohort.** Chi-square or fisher’s exact tests were used for categorical variables, and t-test statistic is reported for continuous variables.

| **Sl. No** | **Variable** | **Case group: Any ADR due to Antineoplastic drug (ICD-10 codes: Y43.0, Y43.1, Y43.3)** | | |  |
| --- | --- | --- | --- | --- | --- |
| **Case**  **[N: 5194]** | **Control**  **[N: 21041]** | **Test statistic (Chi-square/ Fisher’s exact)** | **P-value** |
| **Count (%)** | |
| ***Environmental (Demographic, lifestyle & clinical) variables*** | | | | | |
| 1 | Gender  Male  Female | 2232 (42.97)  2962 (57.02) | 10639 (50.56)  10402 (49.43) | 95.734 | < 0.001 |
| 2 | Major dietary changes in the last 5 years  No  Yes, because of other reasons  Yes, Because of Illness | 2967 (57.21)  1284 (24.75)  935 (18.02) | 12742 (60.69)  5331 (25.39)  2920 (13.90) | 57.015 | <0.001 |
| 3 | Variation in diet  Never / rarely  Sometimes  Often | 1741 (33.91)  3001 (58.45)  392 (7.63) | 7450 (35.73)  11820 (56.70)  1576 (7.56) | 6.134 | 0.046 |
| 4 | Smoking status  Never  Previous  Current | 2412 (46.64)  2117 (40.93)  642 (12.41) | 10198 (48.73)  8342 (39.86)  2384 (11.39) | 8.682 | 0.013 |
| 5 | Alcohol drinking status  Never  Previous  Current | 201 (3.87)  214 (4.12)  4774 (92.00) | 658 (3.13)  789 (3.75)  19563 (93.11) | 9.013 | 0.011 |
| 6 | Oily fish intake  Never  Less than once a week  Once a week  2-4 times a week  5-6 times a week  Once or more daily | 509 (9.84)  1668 (32.27)  2065 (39.95)  876 (16.95)  38 (0.73)  12 (0.23) | 1938 (9.26)  6627 (31.67)  8344 (39.88)  3805 (18.18)  155 (0.74)  50 (0.23) | 5.532 | 0.354 |
| 7 | Non-oily fish intake  Never  Less than once a week  Once a week  2-4 times a week  5-6 times a week  Once or more daily | 190 (3.67)  1503 (29.03)  2667 (51.52)  790 (15.26)  19 (0.36)  7 (0.13) | 733 (3.49)  5840 (27.87)  10917 (52.10)  3348 (15.98)  89 (0.42)  24 (0.11) | 4.449 | 0.486 |
| 8 | Processed meat intake  Never  Less than once a week  Once a week  2-4 times a week  5-6 times a week  Once or more daily | 431 (8.31)  1590 (30.68)  1579 (30.47)  1379 (26.61)  168 (3.24)  35 (0.67) | 1608 (7.65)  6286 (29.94)  6315 (30.07)  5934 (28.26)  687 (3.27)  165 (0.78) | 8.024 | 0.154 |
| 9 | Lamb or mutton intake  Never  Less than once a week  Once a week  2-6 times a week | 811 (15.71)  2920 (56.57)  1274 (24.68)  157 (3.04) | 3259 (15.62)  11849 (56.78)  5198 (24.91)  561 (2.68) | 2.573 | 0.765 |
| 10 | Pork intake  Never  Less than once a week  Once a week  2-6 times a week | 761 (14.74)  2975 (57.61)  1256 (24.32)  172 (3.34) | 2992 (14.32)  12040 (57.63)  5151 (24.65)  710 (3.40) | 2.288 | 0.808 |
| 11 | Cheese intake  Never  Less than once a week  Once a week  2-4 times a week  5-6 times a week  Once or more daily | 118 (2.34)  865 (17.12)  1075 (21.27)  2351 (46.53)  469 (9.28)  175 (3.46) | 550 (2.69)  3406 (16.65)  4394 (21.48)  9378 (45.84)  1982 (9.69)  750 (3.67) | 4.115 | 0.533 |
| 12 | Hot drink temperature  Do not drink  Warm  Hot  Very hot | 39 (0.75)  760 (14.63)  3502 (67.44)  891 (17.16) | 178 (0.84)  3207 (15.24)  14225 (67.66)  3413 (16.23) | 3.710 | 0.294 |
| ***Continuous environmental variables*** | | | | | |
| 13 | Age | 59.32 (6.99) | 60.07 (6.87) | 6.899 | <0.001 |
| 14 | Pulse rate | 70.91 (11.91) | 69.93 (11.88) | -5.190 | <0.001 |
| 15 | Diastolic Blood Pressure | 81.91 (10.46) | 82.46 (10.59) | 3.290 | 0.001 |
| 16 | Systolic Blood Pressure | 140.77 (19.80) | 142.52 (19.83) | 5.585 | <0.001 |
| 17 | Body Mass Index | 27.71 (4.70) | 27.55 (4.72) | -2.231 | 0.025 |
| 18 | White Blood Cells Count | 7.17 (4.31) | 7.01 (2.67) | -2.597 | 0.009 |
| 19 | Red Blood Cells Count | 4.44 (0.44) | 4.51 (0.41) | 10.955 | <0.001 |
| 20 | Haemoglobin concentration | 14.00 (1.30) | 14.24 (1.22) | 12.136 | <0.001 |
| 21 | Mean corpuscular volume | 91.52 (4.80) | 91.53 (4.64) | 0.128 | 0.897 |
| 22 | Mean corpuscular haemoglobin | 31.603 (2.10) | 31.604 (2.02) | 0.054 | 0.956 |
| 23 | HbA1C | 36.75 (7.07) | 36.57 (6.59) | -1.685 | 0.091 |
| 24 | Platelet count | 249.21 (66.31) | 249.49 (61.45) | 0.265 | 0.790 |
| 25 | Monocyte count | 0.503 (0.589) | 0.491 (0.223) | -1.502 | 0.133 |
| 26 | Eosinophil count | 0.172 (0.136) | 0.173 (0.135) | 0.191 | 0.848 |
| 27 | Lymphocyte count | 2.16 (3.59) | 2.00 (1.93) | -3.171 | 0.001 |
| 28 | Reticulocyte count | 0.062 (0.042) | 0.061 (0.041) | -1.384 | 0.166 |
| 29 | Basophil count | 0.036 (0.056) | 0.034 (0.052) | -2.881 | 0.003 |
| 30 | Neutrophil count | 4.29 (1.65) | 4.30 (1.44) | 0.597 | 0.550 |
| 31 | Immature reticulocyte fraction | 0.296 (0.063) | 0.292 (0.061) | -4.522 | <0.001 |
| 32 | High light scatter reticulocyte count | 0.0188 (0.011) | 0.0183 (0.010) | -2.937 | 0.003 |
| 33 | Creatinine enzymatic in urine | 8676.9 (5562) | 8893.1 (5747) | 2.468 | 0.013 |
| 34 | Potassium in urine | 62.83 (33.05) | 64.29 (33.88) | 2.810 | 0.004 |
| 35 | Sodium in urine | 74.52 (42.65) | 75.43 (42.77) | 1.361 | 0.173 |
| 36 | Alkaline phosphate | 88.04 (30.27) | 86.16 (31.27) | -3.908 | <0.001 |
| 37 | Direct bilirubin | 1.811 (0.805) | 1.856 (0.909) | 3.092 | 0.001 |
| 38 | Triglycerides | 1.823 (1.055) | 1.796 (1.015) | -1.666 | 0.095 |
| 39 | C reactive protein | 3.341 (5.63) | 2.853 (4.79) | -5.644 | <0.001 |
| 40 | Cystatin C | 0.953 (0.21) | 0.939 (0.19) | -4.338 | <0.001 |
| 41 | IGF-1 | 20.80 (5.65) | 20.99 (5.77) | 2.168 | 0.030 |
| 42 | Phosphate | 1.161 (0.163) | 1.156 (0.159) | -2.175 | 0.029 |
| 43 | SHBG | 52.31 (27.83) | 51.39 (26.50) | -2.011 | 0.044 |
| 44 | Total bilirubin | 8.86 (4.25) | 9.19 (4.46) | 4.846 | <0.001 |
| 45 | Urate | 313.44 (81.41) | 317.09 (80.02) | 2.851 | 0.004 |
| 46 | Vitamin D | 49.48 (21.32) | 50.61 (21.31) | 3.287 | 0.001 |
| 47 | Lipoprotein A | 43.43 (48.38) | 44.37 (49.01) | 1.097 | 0.272 |
| 48 | Duration of moderate activity | 69.26 (79.23) | 69.62 (78.54) | 0.247 | 0.804 |
| 49 | Time spend outdoors | 3.91 (2.42) | 4.00 (2.38) | 2.380 | 0.017 |
| 50 | Sleep duration | 7.219 (1.17) | 7.213 (1.12) | -0.357 | 0.720 |
| 51 | Birth weight | 3.325 (0.70) | 3.344 (0.69) | 1.287 | 0.198 |
| 52 | Cholesterol | 5.66 (1.20) | 5.67 (1.17) | 0.451 | 0.651 |
| ***Comorbid variables (from ICD-10 codes)*** | | | | | |
| 1 | Acute renal failure, unspecified (N17.9)  No  Yes | 3886 (74.82)  1308 (25.18) | 19103 (90.79)  1938 (9.21) | 978.73 | <0.001 |
| 2 | Lobar pneumonia, unspecified (J18.1)  No  Yes | 4268 (82.17)  926 (17.83) | 19638 (93.33)  1403 (6.67) | 640.02 | <0.001 |
| 3 | Pneumonia, unspecified (J18.9)  No  Yes | 4532 (87.25)  662 (12.75) | 20011 (95.10)  1030 (4.90) | 424.19 | <0.001 |
| 4 | Unspecified intestinal obstruction (K56.6)  No  Yes | 4802 (92.45)  392 (7.55) | 20567 (97.75)  474 (2.25) | 364.16 | <0.001 |
| 5 | Klebsiella pneumonia (B96.1)  No  Yes | 5100 (98.19)  94 (1.81) | 20943 (99.53)  98 (0.47) | 101.74 | <0.001 |
| 6 | Escherichia coli (B96.2)  No  Yes | 4800 (92.41)  394 (7.59) | 20434 (97.12)  607 (2.88) | 249.55 | <0.001 |
| 7 | Aplastic anaemia, unspecified (D61.9)  No  Yes | 4915 (94.63)  279 (5.37) | 20913 (99.39)  128 (0.61) | 615.71 | <0.001 |
| 8 | Hypothyroidism, unspecified (E03.9)  No  Yes | 4614 (88.83)  580 (11.17) | 19375 (92.08)  1666 (7.92) | 55.754 | <0.001 |
| 9 | Pulmonary collapse (J98.1)  No  Yes | 4701 (90.51)  493 (9.49) | 20243 (96.21)  798 (3.79) | 287.97 | <0.001 |
| 10 | Dysphagia (R13)  No  Yes | 4772 (91.86)  422 (8.13) | 20034 (95.20)  1007 (4.79) | 89.522 | <0.001 |
| 11 | Obstruction of bile duct (K83.1)  No  Yes | 5034 (96.92)  160 (3.08) | 20780 (98.76)  261 (1.24) | 88.162 | <0.001 |
| 12 | Myelopathy (G99.2)  No  Yes | 5077 (97.75)  117 (2.25) | 20880 (99.23)  161 (0.77) | 86.494 | <0.001 |
| 13 | Hydronephrosis, unspecified (N13.3)  No  Yes | 4912 (94.57)  282 (5.43) | 20608 (97.94)  433 (2.06) | 177.34 | <0.001 |
| 14 | Acidosis (E87.2)  No  Yes | 4979 (95.86)  215 (4.14) | 20727 (98.51)  314 (1.49) | 146.40 | <0.001 |
| 15 | Abnormal level of blood mineral (R79.0)  No  Yes | 5120 (98.58)  74 (1.42) | 21002 (99.81)  39 (0.19) | 146.32 | <0.001 |
| 16 | Pericardial effusion - noninflammatory (I31.3)  No  Yes | 5057 (97.36)  137 (2.64) | 20865 (99.16)  176 (0.84) | 113.12 | <0.001 |
| 17 | Disorders of plasma-protein metabolism (E88.0)  No  Yes | 5104 (98.27)  90 (1.73) | 20954 (99.59)  87 (0.41) | 106.24 | <0.001 |
| 18 | Pulmonary oedema (J81)  No  Yes | 5127 (98.71)  67 (1.29) | 20982 (99.72)  59 (0.28) | 86.726 | <0.001 |
| 19 | Nonfamilial hypogammaglobulinaemia (D80.1)  No  Yes | 5144 (99.04)  50 (0.96) | 21014 (99.87)  27 (0.13) | 96.259 | <0.001 |
| 20 | Chronic kidney disease, unspecified (N18.9)  No  Yes | 4846 (93.30)  348 (6.70) | 20224 (96.12)  817 (3.88) | 77.246 | <0.001 |
| 21 | Hypoglycaemia, unspecified (E16.2)  No  Yes | 5075 (97.71)  119 (2.29) | 20858 (99.13)  183 (0.87) | 72.718 | <0.001 |
| 23 | Liver disease, unspecified (K76.9)  No  Yes | 5067 (97.55)  127 (2.45) | 20831 (99.00)  210 (1.00) | 67.655 | <0.001 |
| 24 | Delirium, unspecified (F05.9)  No  Yes | 5007 (96.40)  187 (3.60) | 20657 (98.17)  384 (1.83) | 60.833 | <0.001 |
| 25 | Respiratory failure, unspecified (J96.90)  No  Yes | 5074 (97.69)  120 (2.31) | 20823 (98.96)  218 (1.04) | 52.191 | <0.001 |
| 26 | Chronic intractable pain (R52.1)  No  Yes | 5026 (96.77) 168 (3.23) | 20901 (99.33) 140 (0.67) | 234.780 | <0.001 |
| 27 | Splenomegaly, not elsewhere classified (R16.1)  No  Yes | 5089 (97.98) 105 (2.02) | 20947 (99.55) 94 (0.45) | 135.160 | <0.001 |
| 28 | Lymphoedema, not elsewhere classified (I89.0)  No  Yes | 5048 (97.19) 146 (2.81) | 20849 (99.09) 192 (0.91) | 116.560 | <0.001 |
| 29 | Pseudomonas as the cause of diseases (B96.5)  No  Yes | 5079 (97.79) 115 (2.21) | 20885 (99.26) 156 (0.74) | 86.940 | <0.001 |
| 30 | Streptococcus as the cause of diseases (B95.2)  No  Yes | 5125 (98.67) 69 (1.33) | 20981 (99.71) 60 (0.29) | 90.549 | <0.001 |
| 31 | Generalized enlarged lymph nodes (R59.1)  No  Yes | 5089 (97.98) 105 (2.02) | 20903 (99.34) 138 (0.66) | 83.185 | <0.001 |
| 32 | Other streptococci as cause of disease (B95.7)  No  Yes | 5115 (98.48) 79 (1.52) | 20945  (99.54) 96 (0.46) | 69.674 | <0.001 |
| 33 | soft tissue disorder (M79.80)  No  Yes | 5155 (99.25) 39 (0.75) | 21013 (99.87) 28 (0.13) | 60.013 | <0.001 |
| 34 | Bronchiectasis (J47)  No  Yes | 5010 (96.46) 184 (3.54) | 20647 (98.13) 394 (1.87) | 53.148 | <0.001 |
| 35 | Hypothermia (R68.0)  No  Yes | 5164 (99.42) 30 (0.58) | 21025 (99.92) 16 (0.08) | 57.037 | <0.001 |
| 36 | Cholangitis (K83.0)  No  Yes | 5088 (97.96) 106 (2.04) | 20864 (99.16) 177 (0.84) | 55.059 | <0.001 |
| 37 | Congestive heart failure (I50.0)  No  Yes | 4981 (95.90) 213 (4.10) | 20556 (97.69) 485 (2.31) | 51.185 | <0.001 |
| 38 | Calculus of gallbladder (K80.2)  No  Yes | 4836 (93.11) 358 (6.89) | 20095 (95.50) 946 (4.50) | 50.148 | <0.001 |
| 39 | Colostomy and enterostomy malfunction (K91.4)  No  Yes | 5108 (98.34) 86 (1.66) | 20904 (99.35) 137 (0.65) | 48.703 | <0.001 |
| 40 | Actinic keratosis (L57.0)  No  Yes | 5094 (98.07) 100 (1.93) | 20224 (96.12) 817 (3.88) | 46.747 | <0.001 |
| 41 | Hyperhidrosis, unspecified (R61.9)  No  Yes | 5136 (98.88) 58 (1.12) | 20962 (99.62) 79 (0.38) | 42.641 | <0.001 |
| 42 | Gastro-oesophageal reflux disease (K21.9)  No  Yes | 4372 (84.17) 822 (15.83) | 18402 (87.46) 2639 (12.54) | 38.938 | <0.001 |
| 43 | Staphylococcus as the cause of diseases (B95.4)  No  Yes | 5127 (98.71) 67 (1.29) | 20950 (99.57) 91 (0.43) | 49.742 | <0.001 |
| 44 | Venous insufficiency (I87.1)  No  Yes | 5156 (99.27) 38 (0.73) | 21004 (99.82) 37 (0.18) | 43.209 | <0.001 |
| 45 | Dysuria (R30.0)  No  Yes | 5124 (98.65) 70 (1.35) | 20932 (99.48) 109 (0.52) | 41.100 | <0.001 |
| 46 | Hyposplenism (D73.0)  No  Yes | 5136 (98.88) 58 (1.12) | 20949 (99.56) 92 (0.44) | 32.642 | <0.001 |
| 47 | Hypertrophic pyloric stenosis (K31.1)  No  Yes | 5142 (99.00) 52 (1.00) | 20976 (99.69) 65 (0.31) | 43.415 | <0.001 |
| 48 | Predominantly allergic asthma (J45.0)  No  Yes | 5128 (98.73) 66 (1.27) | 20940 (99.52) 101 (0.48) | 39.934 | <0.001 |
| 49 | Unspecified streptococcus as cause of disease (B95.8)  No  Yes | 5167 (99.48) 27 (0.52) | 21017 (99.89) 24 (0.11) | 33.290 | <0.001 |
| 50 | Other specified abnormalities of plasma proteins (R77.8)  No  Yes | 5159 (99.33) 35 (0.67) | 21009 (99.85) 32 (0.15) | 42.496 | <0.001 |
| 51 | Iron deficiency anaemia, unspecified (D50.9)  No  Yes | 4791 (92.24) 403 (7.76) | 19884 (94.50) 1157 (5.50) | 37.646 | <0.001 |
| 52 | Localized swelling, mass and lump, neck (R22.1)  No  Yes | 5148 (99.11) 46 (0.89) | 20977 (99.70) 64 (0.30) | 32.355 | <0.001 |
| 53 | Peritoneal adhesions (K66.0)  No  Yes | 4889 (94.13) 305 (5.87) | 20209 (96.05) 832 (3.95) | 36.499 | <0.001 |
| 54 | Hydroureter (N13.4)  No  Yes | 5147 (99.10) 47 (0.90) | 20983 (99.72) 58 (0.28) | 39.813 | <0.001 |
| 55 | Heart disease, ill defined (I51.8)  No  Yes | 5013 (96.52) 181 (3.48) | 20615 (97.98) 426 (2.02) | 38.653 | <0.001 |
| 56 | Emphysema, unspecified (J43.9)  No  Yes | 5010 (96.46) 184 (3.54) | 20592 (97.87) 449 (2.13) | 34.509 | <0.001 |
| 57 | Intestinal adhesions (K56.5)  No  Yes | 5105 (98.29) 89 (1.71) | 20865 (99.16) 176 (0.84) | 31.176 | <0.001 |
| 58 | Asthma, unspecified (J45.9)  No  Yes | 4463 (85.93) 731 (14.07) | 18706 (88.90) 2335 (11.10) | 35.472 | <0.001 |
| 59 | Hydronephrosis with ureteral stricture, not elsewhere classified (N13.1)  No  Yes | 5139 (98.94) 55 (1.06) | 20948 (99.56) 93 (0.44) | 27.174 | <0.001 |
| 60 | Cord compression, unspecified (G95.2)  No  Yes | 5142 (99.00) 52 (1.00) | 20958 (99.61) 83 (0.39) | 28.777 | <0.001 |
| 61 | Other impaction of intestine (K56.4)  No  Yes | 5153 (99.21) 41 (0.79) | 20983 (99.72) 58 (0.28) | 27.893 | <0.001 |
| 62 | Gastritis, unspecified (K29.7)  No  Yes | 4687 (90.24) 507 (9.76) | 19516 (92.75) 1525 (7.25) | 36.480 | <0.001 |
| 63 | Magnesium deficiency (E61.2)  No  Yes | 5175 (99.63) 19 (0.37) | 21027 (99.93) 14 (0.07) | 27.364 | <0.001 |
| 64 | Respiratory disorders, NEC (J99.8)  No  Yes | 5171 (99.56) 23 (0.44) | 21022 (99.91) 19 (0.09) | 30.220 | <0.001 |
| 65 | Diverticular disease of intestine, unspecified (K57.9)  No  Yes | 4783 (92.09) 411 (7.91) | 19827 (94.23) 1214 (5.77) | 32.566 | <0.001 |
| 66 | Disease of intestine, unspecified (K63.9)  No  Yes | 5134 (98.84) 60 (1.16) | 20939 (99.52) 102 (0.48) | 29.426 | <0.001 |
| 67 | Gangrene (R02)  No  Yes | 5122 (98.61) 72 (1.39) | 20907 (99.36) 134 (0.64) | 29.073 | <0.001 |
| 68 | Infectious gastroenteritis (A09.0)  No  Yes | 5158 (99.31) 36 (0.69) | 20998 (99.80) 43 (0.20) | 31.537 | <0.001 |
| 69 | Chronic sinusitis, unspecified (J32.9)  No  Yes | 5118 (98.54) 76 (1.46) | 20893 (99.30) 148 (0.70) | 27.521 | <0.001 |
| 70 | Senility (R54)  No  Yes | 5037 (96.98) 157 (3.02) | 20666 (98.22) 375 (1.78) | 31.644 | <0.001 |
| 71 | Other spondylosis (M47.8)  No  Yes | 5145 (99.06) 49 (0.94) | 20962 (99.62) 79 (0.38) | 26.517 | <0.001 |
| 72 | Inflammatory liver disease, NEC (K75.0)  No  Yes | 5162 (99.38) 32 (0.62) | 21002 (99.81) 39 (0.19) | 27.063 | <0.001 |
| 73 | Postprocedural disorder of digestive system (K91.8)  No  Yes | 5112 (98.42) 82 (1.58) | 20860 (99.14) 181 (0.86) | 20.952 | <0.001 |
| 74 | Coagulation defect, unspecified (D68.9)  No  Yes | 5165 (99.44) 29 (0.56) | 21005 (99.83) 36 (0.17) | 23.733 | <0.001 |
| 75 | Disorders of both mitral and tricuspid valves (I08.1)  No  Yes | 5101 (98.21) 93 (1.79) | 20831 (99.00) 210 (1.00) | 22.227 | <0.001 |
| 76 | Hypergammaglobulinaemia, unspecified (D89.2)  No  Yes | 5158 (99.31) 36 (0.69) | 20990 (99.76) 51 (0.24) | 24.259 | <0.001 |
| 77 | Chronic kidney disease, stage 2 (N18.2)  No  Yes | 5129 (98.75) 65 (1.25) | 20911 (99.38) 130 (0.62) | 21.817 | <0.001 |
| 78 | Postmastectomy lymphoedema syndrome (I97.2)  No  Yes | 5171 (99.56) 23 (0.44) | 21017 (99.89) 24 (0.11) | 23.372 | <0.001 |
| 79 | Pancreatic disorder, unspecified (K86.9)  No  Yes | 5151 (99.17) 43 (0.83) | 20976 (99.69) 65 (0.31) | 26.114 | <0.001 |
| 80 | Respiratory disorder (J98.8)  No  Yes | 5174 (99.61) 20 (0.39) | 21019 (99.90) 22 (0.10) | 18.789 | <0.001 |
| 81 | Chronic kidney disease, stage 3 (N18.3)  No  Yes | 4858 (93.53) 336 (6.47) | 20040 (95.24) 1001 (4.76) | 24.88 | <0.001 |
| 82 | Disorder involving the immune mechanism, unspecified (D89.9)  No  Yes | 5182 (99.77) 12 (0.23) | 21036 (99.98) 5 (0.02) | # | <0.001 |
| 83 | Other specified diseases of blood and blood-forming organs (D75.8)  No  Yes | 5175 (99.63) 19 (0.37) | 21024 (99.92) 17 (0.08) | 22.658 | <0.001 |
| 84 | Migraine, unspecified (G43.9)  No  Yes | 5064 (97.5) 130 (2.5) | 20705 (98.4) 336 (1.6) | 19.083 | <0.001 |
| 85 | Other obstructive uropathy (N13.8)  No  Yes | 5171 (99.56) 23 (0.44) | 21012 (99.86) 29 (0.14) | 18.077 | <0.001 |
| 86 | Hyperplasia of prostate (N40)  No  Yes | 4780 (92.03) 414 (7.97) | 18922 (89.93) 2119 (10.07) | 20.822 | <0.001 |
| 87 | Inguinal hernia, without obstruction or gangrene (K40.9)  No  Yes | 4927 (94.86) 267 (5.14) | 19599 (93.15) 1442 (6.85) | 19.786 | <0.001 |
| 88 | Alkalosis (E87.3)  No  Yes | 5158 (99.31) 36 (0.69) | 20982 (99.72) 59 (0.28) | 18.538 | <0.001 |
| 89 | Other specified diseases of digestive system (K92.8)  No  Yes | 5183 (99.79) 11 (0.21) | 21035 (99.97) 6 (0.03) | 7.44 | <0.001 |
| 90 | Lymphangitis (I89.1)  No  Yes | 5164 (99.42) 30 (0.58) | 20998 (99.80) 43 (0.20) | 19.589 | <0.001 |
| 91 | Rheumatoid arthritis, unspecified (M06.9)  No  Yes | 5139 (98.94) 55 (1.06) | 20931 (99.48) 110 (0.52) | 18.31 | <0.001 |
| 92 | Deficiency of other specified B group vitamins (E53.8)  No  Yes | 5098 (98.15) 96 (1.85) | 20806 (98.88) 235 (1.12) | 17.307 | <0.001 |
| 93 | Amyloidosis (E85.8)  No  Yes | 5183 (99.79) 11 (0.21) | 21035 (99.97) 6 (0.03) | # | <0.001 |
| 94 | Obstruction of duodenum (K31.5)  No  Yes | 5163 (99.40) 31 (0.60) | 20989 (99.75) 52 (0.25) | 15.064 | <0.001 |
| 95 | Chronic kidney disease, stage 4 (N18.4)  No  Yes | 5139 (98.94) 55 (1.06) | 20917 (99.41) 124 (0.59) | 12.872 | <0.001 |
| 96 | Hydronephrosis with ureteropelvic junction obstruction (N13.0)  No  Yes | 5175 (99.63) 19 (0.37) | 21013 (99.87) 28 (0.13) | 11.349 | <0.001 |

**For continuous variables, t-test statistic is reported along with mean (SD). # Fisher’s exact test*

**Supplementary Table 5. GWAS-identified single nucleotide polymorphisms (SNPs) with known pharmacogenomic associations to antineoplastic drug treatments.**

| **Variant** | **Gene** | **Gene region** | **Cohort identified** | **Summary** |
| --- | --- | --- | --- | --- |
| rs67376798 | *DPYD* | exonic | 1 | Reduces DPD enzyme activity, increasing fluoropyrimidine, capecitabine, tegafur toxicity risk. |
| rs16969968 | *CHRNA5* | exonic | 3, 5 | Influence chemotherapy response in lung cancer linked to nicotine dependence. |
| rs1051730 | *CHRNA3* | exonic | 3, 5 | Linked to lung cancer risk and may affect chemotherapy response. |
| rs2239393 | *COMT* | intronic | 5 | Impacts opioid response (tramadol) in cancer pain management. |
| rs4680 | *COMT* | exonic | 5 | Impacts opioid response (tramadol) in cancer pain management. |
| rs1042713 | *ADRB2* | exonic | 5 | Associated with response to taxane and platinum-based chemotherapy in breast cancer. |
| rs1801394 | *MTRR* | exonic | 5 | Impacts methotrexate toxicity via folate metabolism pathways. |
| rs1800629 | *TNF;LTA* | upstream; downstream | 5 | Influences cancer treatment (etanercept response) and toxicity. |
| rs578776 | *CHRNA3* | UTR3 | 4 | Related to nicotine dependence and lung cancer risk. |
| rs71647871 | *CES1* | exonic | 4 | Affects clopidogrel drug metabolism, potentially relevant for cancer patients on antiplatelet therapy. |
| rs3745274 | *CYP2B6* | exonic | 3, 4 | Affects efavirenz and nevirapine drug response in chronic lymphocytic leukemia (CLL) and breast cancer treatments. |
| rs2298383 | *ADORA2A-AS1* | ncRNA exonic | 1, 4, 6 | Linked to methotrexate toxicity. |
| rs1872328 | *ACYP2* | intronic | 4 | Associated with an increased risk of cisplatin-induced ototoxicity, particularly in pediatric cancer patients. |
| rs4646 | *MIR4713HG* | ncRNA intronic | 6 | Affects hormone therapy (Tamoxifen, Letrozole) response in breast cancer. |
| rs3212986 | *POLR1G* | exonic | 6 | Affects the efficacy of platinum-based chemotherapy treatments (paclitaxel, cisplatin, bleomycin, and etoposide), particularly in DNA-damaging treatments. |
| rs11615 | *ERCC1* | exonic | 3, 6 | Associated with both efficacy and toxicity of various chemotherapies (cisplatin, capecitabine, fluorouracil). |
| rs4673993 | *ATIC* | intronic | 6 | Linked to methotrexate efficacy. |
| rs396991 | *FCGR3A* | exonic | 2 | Affects efficacy of monoclonal antibody therapies in cancer treatment. |
| rs1056892 | *CBR3* | exonic | 2 | Linked to doxorubicin/anthracycline-induced cardiotoxicity risk. |

**complete cohort=1, drug-specific cohort=2, adr-specific cohorts: drug-induced gastroenteritis and colitis=3, drug-induced polyneuropathy=4, secondary thrombocytopenia=5, generalized or localized skin eruptions=6.*

**Supplementary Table 6. Comparative performance of machine learning (ML) models across different feature sets in the four ADR-specific cohorts.**

| **Secondary thrombocytopenia (ICD 10: D69.5)** | | | | | | |
| --- | --- | --- | --- | --- | --- | --- |
| *Model evaluations using genetic-only data* | | | | | | |
| **ML Models** | **Accuracy** | **Precision** | **Sensitivity** | **Specificity** | **F1 Score** | **AUC-ROC** |
| **LR** | 0.91 | 0.75 | 0.84 | 0.93 | 0.79 | 0.94 |
| **RF** | 0.80 | 0.00 | 0.00 | 1.00 | 0.00 | 0.87 |
| **SVM** | 0.83 | 1.00 | 0.16 | 1.00 | 0.28 | 0.92 |
| **XGB** | 0.84 | 0.65 | 0.44 | 0.94 | 0.52 | 0.87 |
| **MLP** | 0.92 | 0.76 | 0.85 | 0.93 | 0.81 | 0.95 |
| *Model evaluations using genetic and environmental data* | | | | | | |
| **ML Models** | **Accuracy** | **Precision** | **Sensitivity** | **Specificity** | **F1 Score** | **AUC-ROC** |
| **LR** | 0.91 | 0.75 | 0.84 | 0.93 | 0.79 | 0.95 |
| **RF** | 0.80 | 0.00 | 0.00 | 1.00 | 0.00 | 0.87 |
| **SVM** | 0.93 | 0.83 | 0.80 | 0.96 | 0.82 | 0.96 |
| **XGB** | 0.83 | 0.64 | 0.36 | 0.95 | 0.46 | 0.84 |
| **MLP** | 0.90 | 0.75 | 0.72 | 0.94 | 0.73 | 0.94 |
| *Model evaluations using genetic, environmental and comorbidities data* | | | | | | |
| **ML Models** | **Accuracy** | **Precision** | **Sensitivity** | **Specificity** | **F1 Score** | **AUC-ROC** |
| **LR** | 0.90 | 0.68 | 0.92 | 0.89 | 0.78 | 0.97 |
| **RF** | 0.80 | 0.00 | 0.00 | 1.00 | 0.00 | 0.90 |
| **SVM** | 0.93 | 0.83 | 0.80 | 0.96 | 0.82 | 0.97 |
| **XGB** | 0.87 | 0.80 | 0.48 | 0.97 | 0.60 | 0.89 |
| **MLP** | 0.92 | 0.83 | 0.76 | 0.96 | 0.79 | 0.97 |
| **Drug-induced polyneuropathy (ICD 10: G62.0)** | | | | | | |
| *Model evaluations using genetic-only data* | | | | | | |
| **ML Models** | **Accuracy** | **Precision** | **Sensitivity** | **Specificity** | **F1 Score** | **AUC-ROC** |
| **LR** | 0.87 | 0.66 | 0.67 | 0.92 | 0.67 | 0.90 |
| **RF** | 0.81 | 1.00 | 0.01 | 1.00 | 0.02 | 0.74 |
| **SVM** | 0.83 | 0.60 | 0.45 | 0.93 | 0.51 | 0.78 |
| **XGB** | 0.80 | 0.46 | 0.21 | 0.94 | 0.29 | 0.76 |
| **MLP** | 0.87 | 0.76 | 0.53 | 0.96 | 0.63 | 0.90 |
| *Model evaluations using genetic and environmental data* | | | | | | |
| **ML Models** | **Accuracy** | **Precision** | **Sensitivity** | **Specificity** | **F1 Score** | **AUC-ROC** |
| **LR** | 0.86 | 0.62 | 0.72 | 0.89 | 0.67 | 0.90 |
| **RF** | 0.80 | 0.00 | 0.00 | 1.00 | 0.00 | 0.73 |
| **SVM** | 0.82 | 0.55 | 0.40 | 0.91 | 0.47 | 0.88 |
| **XGB** | 0.80 | 0.48 | 0.28 | 0.92 | 0.36 | 0.75 |
| **MLP** | 0.86 | 0.70 | 0.54 | 0.94 | 0.61 | 0.90 |
| *Model evaluations using genetic, environmental and comorbidities data* | | | | | | |
| **ML Models** | **Accuracy** | **Precision** | **Sensitivity** | **Specificity** | **F1 Score** | **AUC-ROC** |
| **LR** | 0.88 | 0.69 | 0.71 | 0.92 | 0.70 | 0.92 |
| **RF** | 0.81 | 1.00 | 0.01 | 1.00 | 0.02 | 0.77 |
| **SVM** | 0.86 | 0.65 | 0.48 | 0.95 | 0.55 | 0.90 |
| **XGB** | 0.82 | 0.59 | 0.28 | 0.95 | 0.38 | 0.79 |
| **MLP** | 0.89 | 0.80 | 0.60 | 0.96 | 0.68 | 0.93 |
| **Drug-induced gastroenteritis and colitis (ICD 10: K52.1)** | | | | | | |
| *Model evaluations using genetic-only data* | | | | | | |
| **ML Models** | **Accuracy** | **Precision** | **Sensitivity** | **Specificity** | **F1 Score** | **AUC-ROC** |
| **LR** | 0.81 | 0.53 | 0.60 | 0.87 | 0.57 | 0.83 |
| **RF** | 0.80 | 0.00 | 0.00 | 1.00 | 0.00 | 0.70 |
| **SVM** | 0.80 | 0.48 | 0.30 | 0.91 | 0.38 | 0.68 |
| **XGB** | 0.79 | 0.44 | 0.23 | 0.93 | 0.31 | 0.74 |
| **MLP** | 0.84 | 0.66 | 0.43 | 0.95 | 0.52 | 0.83 |
| *Model evaluations using genetic and environmental data* | | | | | | |
| **ML Models** | **Accuracy** | **Precision** | **Sensitivity** | **Specificity** | **F1 Score** | **AUC-ROC** |
| **LR** | 0.81 | 0.53 | 0.60 | 0.87 | 0.56 | 0.83 |
| **RF** | 0.80 | 0.00 | 0.00 | 1.00 | 0.00 | 0.68 |
| **SVM** | 0.78 | 0.50 | 0.18 | 0.93 | 0.26 | 0.68 |
| **XGB** | 0.81 | 0.53 | 0.22 | 0.95 | 0.31 | 0.74 |
| **MLP** | 0.83 | 0.62 | 0.44 | 0.93 | 0.52 | 0.83 |
| *Model evaluations using genetic, environmental and comorbidities data* | | | | | | |
| **ML Models** | **Accuracy** | **Precision** | **Sensitivity** | **Specificity** | **F1 Score** | **AUC-ROC** |
| **LR** | 0.84 | 0.60 | 0.65 | 0.89 | 0.63 | 0.87 |
| **RF** | 0.80 | 0.00 | 0.00 | 1.00 | 0.00 | 0.77 |
| **SVM** | 0.82 | 0.55 | 0.35 | 0.94 | 0.43 | 0.73 |
| **XGB** | 0.81 | 0.52 | 0.36 | 0.92 | 0.43 | 0.79 |
| **MLP** | 0.87 | 0.72 | 0.55 | 0.95 | 0.62 | 0.87 |
| **Generalized and localized skin eruption (ICD 10: L27.0 & L27.1)** | | | | | | |
| *Model evaluations using genetic-only data* | | | | | | |
| **ML Models** | **Accuracy** | **Precision** | **Sensitivity** | **Specificity** | **F1 Score** | **AUC-ROC** |
| **LR** | 0.88 | 0.66 | 0.78 | 0.90 | 0.71 | 0.89 |
| **RF** | 0.80 | 1.00 | 0.03 | 1.00 | 0.05 | 0.78 |
| **SVM** | 0.82 | 0.58 | 0.34 | 0.95 | 0.43 | 0.87 |
| **XGB** | 0.82 | 0.62 | 0.31 | 0.95 | 0.41 | 0.77 |
| **MLP** | 0.87 | 0.72 | 0.60 | 0.94 | 0.65 | 0.85 |
| *Model evaluations using genetic and environmental data* | | | | | | |
| **ML Models** | **Accuracy** | **Precision** | **Sensitivity** | **Specificity** | **F1 Score** | **AUC-ROC** |
| **LR** | 0.87 | 0.65 | 0.78 | 0.90 | 0.71 | 0.89 |
| **RF** | 0.80 | 1.00 | 0.01 | 1.00 | 0.03 | 0.74 |
| **SVM** | 0.82 | 0.55 | 0.30 | 0.94 | 0.39 | 0.87 |
| **XGB** | 0.81 | 0.56 | 0.26 | 0.95 | 0.35 | 0.77 |
| **MLP** | 0.88 | 0.75 | 0.60 | 0.95 | 0.67 | 0.88 |
| *Model evaluations using genetic, environmental and comorbidities data* | | | | | | |
| **ML Models** | **Accuracy** | **Precision** | **Sensitivity** | **Specificity** | **F1 Score** | **AUC-ROC** |
| **LR** | 0.85 | 0.60 | 0.74 | 0.88 | 0.66 | 0.90 |
| **RF** | 0.80 | 0.00 | 0.00 | 1.00 | 0.00 | 0.79 |
| **SVM** | 0.83 | 0.58 | 0.39 | 0.96 | 0.47 | 0.86 |
| **XGB** | 0.83 | 0.62 | 0.42 | 0.93 | 0.50 | 0.79 |
| **MLP** | 0.89 | 0.81 | 0.57 | 0.97 | 0.67 | 0.89 |

**Supplementary Table 7. Comparative performance of ML models across different feature sets in the complete case-control cohort.**

| *Model evaluations using genetic-only data* | | | | | | |
| --- | --- | --- | --- | --- | --- | --- |
| **ML Models** | **Accuracy** | **Precision** | **Sensitivity** | **Specificity** | **F1 Score** | **AUC-ROC** |
| **LR** | 0.65 | 0.30 | 0.58 | 0.66 | 0.40 | 0.67 |
| **RF** | 0.80 | 0.00 | 0.00 | 1.00 | 0.00 | 0.56 |
| **SVM** | 0.68 | 0.29 | 0.40 | 0.75 | 0.33 | 0.58 |
| **XGB** | 0.69 | 0.28 | 0.34 | 0.78 | 0.30 | 0.60 |
| **MLP** | 0.71 | 0.27 | 0.26 | 0.82 | 0.26 | 0.60 |
| *Model evaluations using genetic and environmental data* | | | | | | |
| **ML Models** | **Accuracy** | **Precision** | **Sensitivity** | **Specificity** | **F1 Score** | **AUC-ROC** |
| **LR** | 0.66 | 0.31 | 0.60 | 0.67 | 0.41 | 0.69 |
| **RF** | 0.80 | 0.00 | 0.00 | 1.00 | 0.00 | 0.56 |
| **SVM** | 0.69 | 0.30 | 0.42 | 0.72 | 0.35 | 0.59 |
| **XGB** | 0.66 | 0.28 | 0.44 | 0.72 | 0.34 | 0.62 |
| **MLP** | 0.74 | 0.30 | 0.23 | 0.87 | 0.26 | 0.61 |
| *Model evaluations using genetic, environmental and comorbidities data* | | | | | | |
| **ML Models** | **Accuracy** | **Precision** | **Sensitivity** | **Specificity** | **F1 Score** | **AUC-ROC** |
| **LR** | 0.75 | 0.41 | 0.66 | 0.77 | 0.51 | 0.79 |
| **RF** | 0.80 | 0.00 | 0.00 | 1.00 | 0.00 | 0.67 |
| **SVM** | 0.76 | 0.41 | 0.48 | 0.80 | 0.44 | 0.75 |
| **XGB** | 0.78 | 0.44 | 0.42 | 0.87 | 0.43 | 0.72 |
| **MLP** | 0.71 | 0.35 | 0.51 | 0.77 | 0.41 | 0.71 |
